# Supplementary material for: Dihydrobenzofuran production from catalytic tandem Claisen rearrangement–intramolecular hydroaryloxylation of allyl phenyl ethers in subcritical water
Source: Royal Society of Chemistry journal article supplement (doi:10.1039/c4ra04689g), 2014-01-01
Supplement: c4ra04689g1.pdf [file c4ra04689g1.pdf]

## Supporting Information

### **Dihydrobenzofurans production from catalytic tandem Claisen rearrangement–intramolecular hydroaryloxylation of allyl phenyl ethers in subcritical water**

Ligang Luo, Chunze Liu, Zhiqiang Hou, Yuanyuan Wang\* and Liyi Dai\*

Department of Chemistry, East China Normal University, 200062

Shanghai, China.

Fax: 021-62602447; Tel: 021-62233037;

E-mail: [yywang@chem.ecnu.edu.cn](mailto:yywang@chem.ecnu.edu.cn); [lydai@chem.ecnu.edu.cn](mailto:lydai@chem.ecnu.edu.cn);

## NMR Characterizations

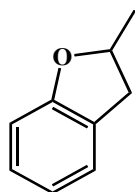

**2-methyl-2,3-Dihydro-benzofuran (Table 1, entry 4):**  $^1\text{H}$  NMR ( $\text{CDCl}_3$ , 400 MHz):  $\delta$  7.13 (d,  $J = 7.6$  Hz, 1 H), 7.09 (t,  $J = 7.6$  Hz, 1 H), 6.82 (t,  $J = 7.2$  Hz, 1 H), 6.74 (d,  $J = 7.6$  Hz, 1 H), 4.91 (m, 1 H), 3.32 (dd,  $J = 15.2, 8.8$  Hz, 1 H), 2.81 (dd,  $J = 15.2, 7.6$  Hz, 1 H), 1.45 (d,  $J = 6.4$  Hz, 3 H).

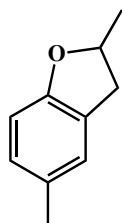

**2,5-dimethyl-2,3-dihydrobenzofuran (Table 4, entry 1):**  $^1\text{H}$  NMR ( $\text{CDCl}_3$ , 400 MHz):  $\delta$ : 6.97 (s, 1 H), 6.90 (d,  $J = 8.2$  Hz, 1 H), 6.66 (d,  $J = 8.2$  Hz, 1 H), 4.90 (dt,  $J = 6.4, 8.0$  Hz, 1 H), 3.26 (dd,  $J = 8.6, 15.2$  Hz, 1 H), 2.78 (dd,  $J = 7.7, 15.2$  Hz, 1 H), 2.28 (s, 3 H), 1.46 (d,  $J = 6.5$  Hz, 3 H).

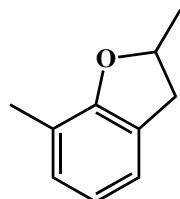

**2,7-dimethyl-2,3-dihydrobenzofuran (Table 4, entry 2):**  $^1\text{H}$  NMR ( $\text{CDCl}_3$ , 400 MHz):  $\delta$ : 6.98 (d,  $J = 7.5$  Hz, 1 H), 6.93 (d,  $J = 7.5$  Hz, 1 H), 6.73 (t,  $J = 7.5$  Hz, 1 H), 4.94 (dt,  $J = 6.1, 8.1$  Hz, 1 H), 3.28 (dd,  $J = 8.6, 15.3$  Hz, 1 H), 2.81 (dd,  $J = 7.7, 15.2$  Hz, 1 H), 2.20 (s, 3 H), 1.46 (d,  $J = 6.2$  Hz, 3 H).

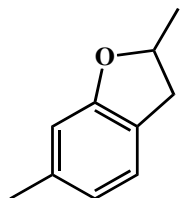

**2,6-dimethyl-2,3-dihydro-benzofuran (Table 4, entry 3A):**  $^1\text{H}$  NMR ( $\text{CDCl}_3$ , 400 MHz):  $\delta$ : 6.89 (d,  $J = 7.4$  Hz, 1 H), 6.57 (t,  $J = 7.3$  Hz, 1 H), 6.52 (d,  $J = 7.5$  Hz, 1 H), 4.25 (dt,  $J = 6.4, 8.0$  Hz, 1 H), 3.06 (dd,  $J = 8.5, 15.6$  Hz, 1 H), 2.81 (dd,  $J = 7.6, 15.1$  Hz, 1 H), 2.35 (s, 3 H), 1.43 (d,  $J = 6.1$  Hz, 3 H).

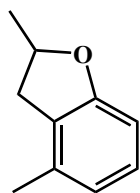

**2,4-dimethyl-2,3-dihydrobenzofuran (Table 4, entry 3B):**  $^1\text{H}$  NMR ( $\text{CDCl}_3$ , 400 MHz);  $\delta$ : 7.05 (t,  $J = 8.0$  Hz, 1 H), 6.69 (d,  $J = 8.0$  Hz, 1 H), 6.64 (d,  $J = 8.0$  Hz, 1 H), 4.95 (br s,  $J = 7$  Hz, 1 H), 3.27 (dd,  $J = 16.0$  Hz, 1 H), 2.75 (dd,  $J = 7.5, 16.0$  Hz, 1 H), 2.27 (s, 3 H), 1.51 (d,  $J = 5.9$  Hz, 3 H).

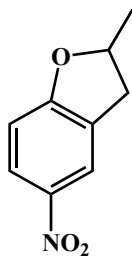

**2-methyl-5-nitro-2,3-dihydrobenzofuran (Table 4, entry 4):**  $^1\text{H}$  NMR ( $\text{CDCl}_3$ , 400 MHz);  $\delta$ : 7.85 (s, 1 H), 7.90 (d,  $J = 8.1$  Hz, 1 H), 7.02 (d,  $J = 8.3$  Hz, 1 H), 5.10 (m, 1 H); 3.55 (dd,  $J = 15.6, 9.3$  Hz, 1 H); 3.18 (dd,  $J = 15.6$  Hz, 1 H), 3.03 (dd,  $J = 7.5$  Hz, 1 H); 1.82 (d,  $J = 6.2$  Hz, 3 H).

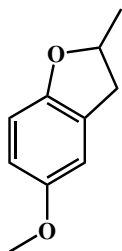

**5-methoxy-2-methyl-2,3-dihydrobenzofuran (Table 4, entry 5):**  $^1\text{H}$  NMR ( $\text{CDCl}_3$ , 400 MHz);  $\delta$ : 6.75 (s, 1H), 6.64 (s, 2H), 4.91 (dt,  $J = 6.0, 8.2$  Hz, 1H), 3.75 (s, 3H), 3.29 (dd,  $J = 8.6, 14.7$  Hz, 1 H), 2.78 (dd,  $J = 7.7, 14.7$  Hz, 1 H), 1.46 (d,  $J = 6.0$  Hz, 3 H).

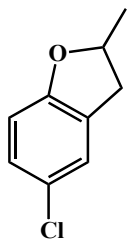

**2,3-Dihydro-5-chloro-2-methylbenzofuran (Table 4, entry 6):**  $^1\text{H}$  NMR ( $\text{CDCl}_3$ , 400 MHz);  $\delta$ : 1.45 (d,  $J = 6.3$  Hz, 3 H), 2.74 (dd,  $J = 15.5$  Hz, 1 H), 2.85 (dd,  $J = 7.5$  Hz, 1 H), 3.27 (dd,  $J = 8.8, 15.5$  Hz, 1 H), 4.91 (m, 1 H), 6.65 (d,  $J = 8.3$  Hz, 1 H), 7.04 (d,  $J = 8.3$  Hz, 1 H), 7.10 (s, 1 H).

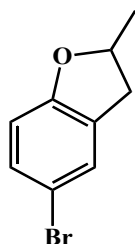

**5-bromo-2-methyl-2,3-dihydrobenzofuran (Table 4, entry 7):**  $^1\text{H}$  NMR ( $\text{CDCl}_3$ , 400 MHz)  $\delta$ : 7.22 (s, 1 H), 7.18 (d,  $J=8.1$  Hz, 1 H), 6.62 (d,  $J=8.3$  Hz, 1 H), 4.94 (m, 1 H), 3.28 (dd, 1 H), 2.78 (dd,  $J=15.4$  Hz, 1 H), 1.45 (d,  $J=6.7$  Hz, 3 H).

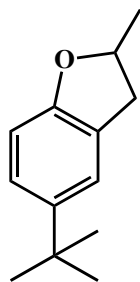

**5-tert-Butyl-2,3-dihydro-2-methylbenzofuran (Table 4, entry 8):**  $^1\text{H}$  NMR ( $\text{CDCl}_3$ , 400 MHz):  $\delta$ : 7.26 (s, 1 H), 7.12 (d,  $J=8.41$  Hz, 1 H), 6.67 (d,  $J=8.36$  Hz, 1 H), 4.90 (m, 1 H), 3.29 (dd,  $J=8.74, 6.55$  Hz, 1 H), 2.80 (dd,  $J=7.87, 7.42$  Hz, 1 H), 1.46 (d,  $J=6.31$  Hz, 3 H), 1.29 (s, 9 H).

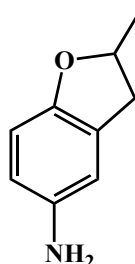

**2-methyl-2,3-dihydrobenzofuran-5-amine (Table 4, entry 9):**  $^1\text{H}$  NMR ( $\text{CDCl}_3$ , 400 MHz):  $\delta$ : 6.92 (s, 1 H), 6.67 (d,  $J=7.9$  Hz, 1 H), 6.43 (d,  $J=8.1$  Hz, 1 H), 4.25 (m, 1 H), 4.0 (s, 2 H), 3.36 (dd,  $J=15.5$  Hz, 1 H), 2.93 (dd,  $J=15.4$  Hz, 1 H), 1.43 (d,  $J=6.7$  Hz, 3 H).

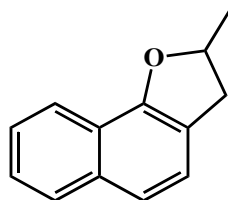

**2,3-Dihydro-2-methylnaphthofuran (Table 4, entry 10):**  $^1\text{H}$  NMR ( $\text{CDCl}_3$ , 400 MHz)  $\delta$ : 7.98 (d,  $J=2.5$  Hz, 1 H), 7.80 (d,  $J=2.5$  Hz, 1 H), 7.45-7.31 (m, 4 H), 5.19-5.13 (m, 1 H), 3.51 (dd,  $J=9.1, 15.0$  Hz, 1 H), 2.98 (dd,  $J=7.5, 15.0$  Hz, 1 H), 1.58 (d,  $J=6.3$  Hz, 3 H).

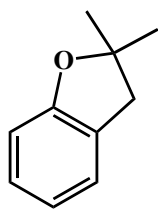

**2,2-dimethyl-2,3-Dihydrobenzofuran (Table 4, entry 11)**  $^1\text{H}$  NMR ( $\text{CDCl}_3$ , 400 MHz)  $\delta$ : 7.17 (m, 1H), 7.11(m, 1H), 6.84 (t,  $J$  = 7.3 Hz, 1H), 6.76 (d,  $J$  = 8.0 Hz, 1H), 3.01 (s, 2H), 1.50 (s, 6H).

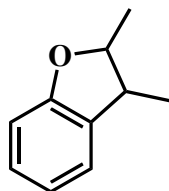

**2,3-dimethyl-2,3-dihydrobenzofuran (Table 4, entry 12):**  $^1\text{H}$  NMR ( $\text{CDCl}_3$ , 400 MHz):  $\delta$ : 7.15 (m, 1 H), 7.11(d,  $J$  = 8.0 Hz, 1H), 6.88 (m, 1H), 6.79 (m, 1 H), 4.35 (dq,  $J$  = 8.3, 6.3 Hz, 1H), 3.09 (m, 1 H), 1.49 (d,  $J$  = 6.3 Hz, 3H), 1.32 (d,  $J$  = 6.9 Hz, 3H).

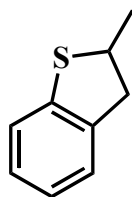

**2-methyl-2,3-dihydrobenzothiophene (Table 4, entry 13):**  $^1\text{H}$  NMR ( $\text{CDCl}_3$ , 400 MHz):  $\delta$ : 7.28 (s, 1 H), 7.10 (d,  $J$  = 7.5 Hz, 1 H), 7.15(d,  $J$  = 8.1 Hz, 1 H), 6.94 (m, 1 H), 3.96 (m, 1H), 3.36 (dd,  $J$  = 15.5 Hz, 1H), 2.93 (dd,  $J$  = 15.3 Hz, 1 H), 1.43 (d,  $J$  = 6.7 Hz, 3H).
